# Supplementary material
Source: PubMed Central journal article supplement (PMC4833657)
Supplement: NIHMS740961-supplement-PMB521195supp_figure_pdf.pdf [file NIHMS740961-supplement-PMB521195supp_figure_pdf.pdf]

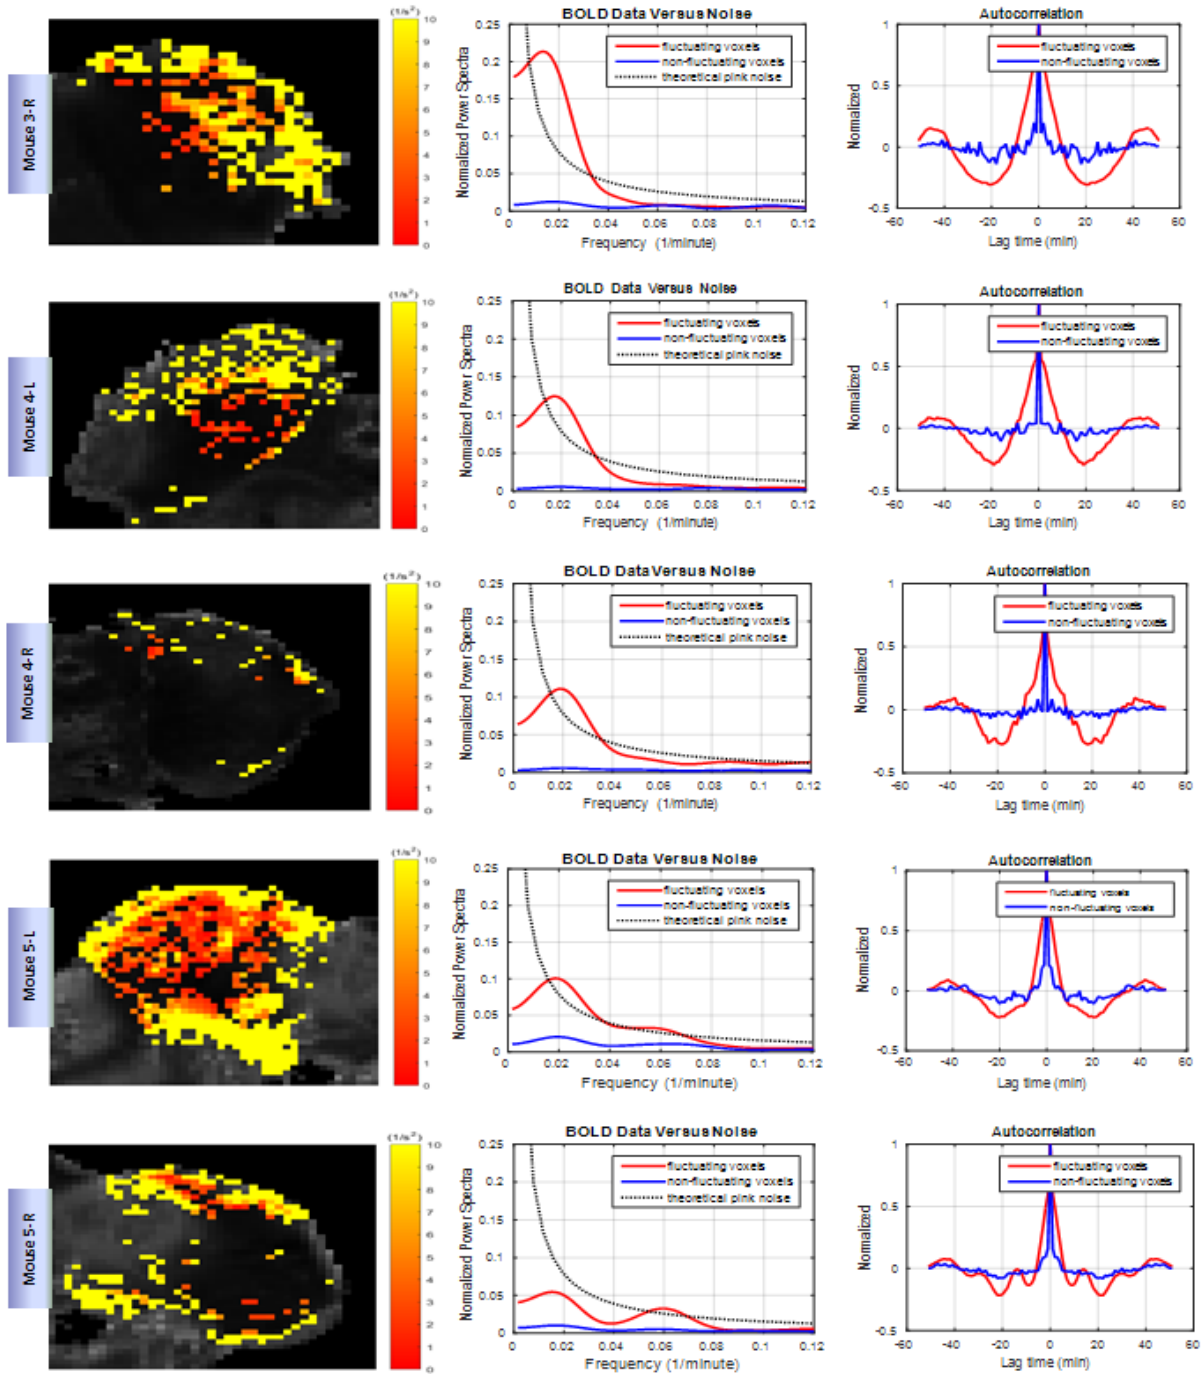

Supplementary figure: Remaining half of the xenografts in this study. Each row represents data for one individual tumor. The figures on the left show the intensity of fluctuation of voxels spatially distributed over the tumor. The dark voxels are considered non-fluctuating. The figures in the center are the averaged power spectra of fluctuating and non-fluctuating voxels compared to pink noise. To the right, are the averaged autocorrelation functions of the time series functions of fluctuating and non-fluctuating voxels.
